# Supplementary material for: Betulin Complex in γ-Cyclodextrin Derivatives: Properties and Antineoplasic Activities in In Vitro and In Vivo Tumor Models
Source: Int J Mol Sci. 2012 Nov 15;13(11):14992–5011. doi: 10.3390/ijms131114992 (PMC3509624; doi:10.3390/ijms131114992)
Supplement: Supplementary file 1 [file ijms-13-14992-s001.pdf]

## Supplementary Information

**Figure S1.** Histograms of Cycle test analysis for B16 4A5 cells treated with GCDG (a), GCDG:Bet 1:1 complex (b) and Bet alone (c) compared with the control (untreated cells).

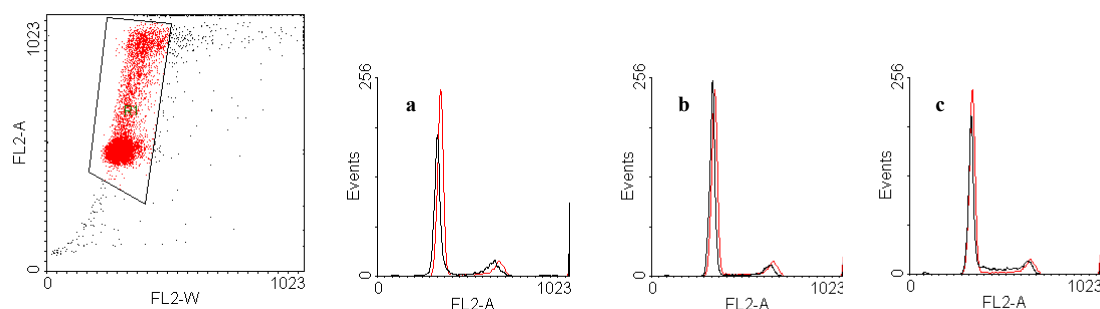

**Table SI.** Percentage of afflicted cells when treated with Bet in different combinations, compared with control.

| Cellular Type | Substance<br>(10 $\mu$ M) | Afflicted Cells     |                  |
|---------------|---------------------------|---------------------|------------------|
|               |                           | Apoptotic cells (%) | Dead cells (%)   |
| B16 4A5       | Control                   | $4.29 \pm 0.18$     | $5.39 \pm 0.24$  |
| B16 4A5       | DMSO                      | $4.88 \pm 0.19$     | $5.28 \pm 0.19$  |
| B16 4A5       | GCDG                      | $5.58 \pm 0.21$     | $4.49 \pm 0.16$  |
| B16 4A5       | Bet:GCDG 1:1 complex      | $5.36 \pm 0.17$     | $10.65 \pm 0.29$ |
| B16 4A5       | Bet                       | $15.23 \pm 0.34$    | $12.28 \pm 0.26$ |

**Table SII.** Mean tumor weight for the 2 groups.

| Mice Group               | Wet Tumor Weight (g) |
|--------------------------|----------------------|
| Non treated (vehicle)    | $0.46 \pm 0.02$      |
| Treated with Bet complex | $0.18 \pm 0.01$      |
